# Supplementary material for: Loss of biochemical response at any time worsens outcomes in UDCA-treated patients with primary biliary cholangitis
Source: PubMed Central journal article supplement — JHEP Rep. 2024 Jul 8;6(10):101168. doi: 10.1016/j.jhepr.2024.101168 (PMC11460452; doi:10.1016/j.jhepr.2024.101168), 2024-07-08
Supplement: mmc1.pdf [file mmc1.pdf]

# **Loss of biochemical response at any time worsens outcomes in UDCA-treated patients with primary biliary cholangitis**

Surain B Roberts, Woo Jin Choi, Lawrence Worobetz, Catherine Vincent, Jennifer A Fleming, Angela Cheung, Karim Qumosani, Mark Swain, Dusanka Grbic, Hin Hin Ko, Kevork M Peltekian, Lusine Abrahamyan, Monika Saini, Kattleya Tirona, Bishoi Aziz, Ellina Lytvyak, Pietro Invernizzi, Cyriel Y Ponsioen, Tony Bruns, Nora Cazzagon, Keith Lindor, George N Dalekos, Nikolaos K Gatselis, Xavier Verhelst, Annarosa Floreani, Christophe Corpechot, Marlyn J Mayo, Cynthia Levy, Maria-Carlota Londoño, Pier M Battezzati, Albert Pares, Frederik Nevens, Adriaan van der Meer, Kris V Kowdley, Palak J Trivedi, Ana Lleo, Douglas Thorburn, Marco Carbone, Nazia Selzner, Aliya F Gulamhusein, Harry LA Janssen, Aldo J Montano-Loza, Andrew L Mason, Gideon M Hirschfield, Bettina E Hansen, on behalf of the Canadian Network for Autoimmune Liver disease (CaNAL)

## Table of contents

|               |   |
|---------------|---|
| Table S1..... | 2 |
| Table S2..... | 3 |
| Table S3..... | 4 |
| Table S4..... | 5 |

Table S1: Percent of Missing Values in Imputation: CaNAL Cohort

| Variable                   | Percent Missing |
|----------------------------|-----------------|
| Alkaline Phosphatase       | 17.3%           |
| Total Bilirubin            | 21.3%           |
| Aspartate Aminotransferase | 29.2%           |
| Alanine Aminotransferase   | 16.8%           |
| Platelet Count             | 14.4%           |
| Albumin                    | 33.3%           |

Variables not included in this table had no missing values.

Table S2: Association between Age at UDCA Initiation and Rates of Biochemical State Transition

| Main Analysis (n=823)                           |                   | Sensitivity Analysis (n=823) |                   | External Validation (n=2237) |                   |
|-------------------------------------------------|-------------------|------------------------------|-------------------|------------------------------|-------------------|
| <u>State Transition</u>                         | <u>HR (95%CI)</u> | <u>State Transition</u>      | <u>HR (95%CI)</u> | <u>State Transition</u>      | <u>HR (95%CI)</u> |
| IR1 → AR1                                       | 1.03 (1.01-1.04)  | IR1 → AR1                    | 1.03 (1.01-1.04)  | IR1 → AR1                    | 1.01 (1.01-1.02)  |
| AR1 → IR2                                       | 1.00 (0.99-1.01)  | AR1 → IR2                    | 0.99 (0.98-1.00)  | AR1 → IR2                    | 1.00 (0.99-1.00)  |
| IR2 → AR2                                       | 1.04 (1.03-1.05)  | IR2 → AR2                    | 1.04 (1.03-1.05)  | IR2 → AR2                    | 1.02 (1.01-1.03)  |
| AR2 → IR3                                       | 1.00 (0.99-1.01)  | AR2 → IR3                    | 1.00 (0.99-1.02)  | AR2 → IR3                    | 0.98 (0.97-0.99)  |
| IR3 → AR3                                       | 1.04 (1.02-1.06)  | IR3 → AR3                    | 1.03 (1.02-1.05)  | IR3 → AR3                    | 1.01 (1.01-1.03)  |
| AR3 → IR4+                                      | 1.04 (1.01-1.06)  | AR3 → IR4+                   | 1.03 (1.01-1.05)  | AR3 → IR4+                   | 0.99 (0.97-1.01)  |
| <b>Transition to Liver Transplant or Death:</b> |                   |                              |                   |                              |                   |
| IR1 → LTx/D                                     | 0.99 (0.96-1.02)  | IR1 → LTx/D                  | 0.98 (0.95-1.02)  | IR1 → LTx/D                  | 1.04 (1.03-1.05)  |
| AR1 → LTx/D                                     | 1.12 (1.06-1.18)  | AR1 → LTx/D                  | 1.14 (1.06-1.23)  | AR1 → LTx/D                  | 1.22 (1.12-1.33)  |
| IR2 → LTx/D                                     | 1.01 (0.97-1.05)  | IR2 → LTx/D                  | 1.00 (0.96-1.04)  | IR2 → LTx/D                  | 1.06 (1.03-1.08)  |
| AR2 → LTx/D                                     | 0.77 (0.46-1.29)  | AR2 → LTx/D                  | 1.15 (1.03-1.29)  | AR2 → LTx/D                  | 1.27 (1.12-1.43)  |
| IR3 → LTx/D                                     | 0.99 (0.95-1.04)  | IR3 → LTx/D                  | 1.06 (0.99-1.03)  | IR3 → LTx/D                  | 1.05 (1.01-1.10)  |
| AR3 → LTx/D                                     | 0.97 (0.85-1.10)  | AR3 → LTx/D                  | 0.78 (0.50-1.21)  | AR3 → LTx/D                  | 1.18 (1.03-1.35)  |
| IR4+ → LTx/D                                    | 1.05 (1.01-1.09)  | IR4+ → LTx/D                 | 1.05 (1.01-1.09)  | IR4+ → LTx/D                 | 1.03 (0.99-1.08)  |

Hazard ratios are per one-year increase in age at UDCA initiation. Hazard ratios are derived based on the fitted multistate model, by exponentiating the estimated covariate effects on the log-transition intensities.

Abbreviations: Initial inadequate response, IR1; 1<sup>st</sup> adequate response, AR1; 2<sup>nd</sup> inadequate response, IR2; 2<sup>nd</sup> adequate response, AR2; 3<sup>rd</sup> inadequate response, IR3; 3<sup>rd</sup> adequate response, AR3; 4<sup>th</sup> inadequate response and all states thereafter, IR4. Liver transplant or dead, LTx/D; Hazard Ratio, HR.

Table S3: Association between ALP at UDCA 1-year and Rates of Biochemical State Transition

| Main Analysis (n=823)                          |                              | Sensitivity Analysis (n=823) |                   | External Validation (n=2237) |                   |
|------------------------------------------------|------------------------------|------------------------------|-------------------|------------------------------|-------------------|
| <u>State Transition</u>                        | <u>HR (95%CI)</u>            | <u>State Transition</u>      | <u>HR (95%CI)</u> | <u>State Transition</u>      | <u>HR (95%CI)</u> |
| IR1 → AR1                                      | 0.55 (0.40-0.74)             | IR1 → AR1                    | 0.53 (0.39-0.71)  | IR1 → AR1                    | 0.21 (0.17-0.27)  |
| AR1 → IR2                                      | 2.20 (1.83-2.65)             | AR1 → IR2                    | 2.09 (1.75-2.50)  | AR1 → IR2                    | 3.01 (2.61-3.48)  |
| IR2 → AR2                                      | 0.65 (0.52-0.80)             | IR2 → AR2                    | 0.73 (0.58-0.92)  | IR2 → AR2                    | 0.58 (0.48-0.70)  |
| AR2 → IR3                                      | 1.54 (1.18-1.99)             | AR2 → IR3                    | 1.88 (1.44-2.46)  | AR2 → IR3                    | 1.38 (1.10-1.74)  |
| IR3 → AR3                                      | 0.69 (0.51-0.93)             | IR3 → AR3                    | 0.92 (0.68-1.25)  | IR3 → AR3                    | 1.15 (0.84-1.57)  |
| AR3 → IR4+                                     | 1.96 (1.36-2.83)             | AR3 → IR4+                   | 1.21 (0.86-1.70)  | AR3 → IR4+                   | 0.69 (0.49-0.99)  |
| <b>Transition to Liver Transplant or Death</b> |                              |                              |                   |                              |                   |
| IR1 → LTx/D                                    | 0.86 (0.46-1.61)             | IR1 → LTx/D                  | 0.70 (0.40-1.23)  | IR1 → LTx/D                  | 1.02 (0.80-1.21)  |
| AR1 → LTx/D                                    | 0.33 (0.06-1.80)             | AR1 → LTx/D                  | 0.32 (0.04-2.93)  | AR1 → LTx/D                  | 4.30 (1.33-13.9)  |
| IR2 → LTx/D                                    | 1.69 (0.94-3.03)             | IR2 → LTx/D                  | 1.09 (0.62-1.92)  | IR2 → LTx/D                  | 0.49 (0.31-0.77)  |
| AR2 → LTx/D                                    | 15.32 (0.0-10 <sup>5</sup> ) | AR2 → LTx/D                  | 1.10 (0.03-44.26) | AR2 → LTx/D                  | 0.48 (0.07-3.37)  |
| IR3 → LTx/D                                    | 0.79 (0.41-1.54)             | IR3 → LTx/D                  | 0.59 (0.23-1.49)  | IR3 → LTx/D                  | 0.55 (0.19-1.55)  |
| AR3 → LTx/D                                    | 0.30 (0.02-3.63)             | AR3 → LTx/D                  | 1.38 (0.01-163.4) | AR3 → LTx/D                  | 4.61 (0.27-77.7)  |
| IR4+ → LTx/D                                   | 1.14 (0.54-2.38)             | IR4+ → LTx/D                 | 0.98 (0.50-1.93)  | IR4+ → LTx/D                 | 0.94 (0.36-2.42)  |

Hazard ratios are per one unit increase in log<sub>e</sub>(ALP) at UDCA initiation. Hazard ratios are derived based on the fitted multistate model, by exponentiating the estimated covariate effects on the log-transition intensities.

Abbreviations: Initial inadequate response, IR1; 1<sup>st</sup> adequate response, AR1; 2<sup>nd</sup> inadequate response, IR2; 2<sup>nd</sup> adequate response, AR2; 3<sup>rd</sup> inadequate response, IR3; 3<sup>rd</sup> adequate response, AR3; 4<sup>th</sup> inadequate response and all states thereafter, IR4. Liver transplant or dead, LTx/D; Hazard Ratio, HR.

Table S4: Association between Total Bilirubin at UDCA 1-year and Rates of Biochemical State Transition

| Main Analysis (n=823)                          |                   | Sensitivity Analysis (n=823) |                   | External Validation (n=2237) |                   |
|------------------------------------------------|-------------------|------------------------------|-------------------|------------------------------|-------------------|
| <u>State Transition</u>                        | <u>HR (95%CI)</u> | <u>State Transition</u>      | <u>HR (95%CI)</u> | <u>State Transition</u>      | <u>HR (95%CI)</u> |
| IR1 → AR1                                      | 0.99 (0.78-1.27)  | IR1 → AR1                    | 0.88 (0.69-1.13)  | IR1 → AR1                    | 0.48 (0.41-0.56)  |
| AR1 → IR2                                      | 1.41 (1.18-1.67)  | AR1 → IR2                    | 2.08 (1.69-2.56)  | AR1 → IR2                    | 1.63 (1.37-1.94)  |
| IR2 → AR2                                      | 0.69 (0.56-0.85)  | IR2 → AR2                    | 0.66 (0.52-0.84)  | IR2 → AR2                    | 0.75 (0.61-0.91)  |
| AR2 → IR3                                      | 1.98 (1.52-2.57)  | AR2 → IR3                    | 1.78 (1.28-2.46)  | AR2 → IR3                    | 1.90 (1.45-2.50)  |
| IR3 → AR3                                      | 0.80 (0.57-1.11)  | IR3 → AR3                    | 0.73 (0.50-1.06)  | IR3 → AR3                    | 0.99 (0.74-1.32)  |
| AR3 → IR4+                                     | 1.52 (1.10-2.10)  | AR3 → IR4+                   | 1.96 (1.27-3.01)  | AR3 → IR4+                   | 1.21 (0.83-1.78)  |
| <b>Transition to Liver Transplant or Death</b> |                   |                              |                   |                              |                   |
| IR1 → LTx/D                                    | 3.04 (2.03-4.56)  | IR1 → LTx/D                  | 3.37 (2.18-5.21)  | IR1 → LTx/D                  | 2.91 (2.48-3.42)  |
| AR1 → LTx/D                                    | 1.20 (0.55-2.60)  | AR1 → LTx/D                  | 1.05 (0.28-3.98)  | AR1 → LTx/D                  | 8.84 (1.04-75.3)  |
| IR2 → LTx/D                                    | 1.63 (0.95-2.78)  | IR2 → LTx/D                  | 1.92 (1.07-3.44)  | IR2 → LTx/D                  | 1.18 (0.67-2.06)  |
| AR2 → LTx/D                                    | 0.01 (0.01-64.9)  | AR2 → LTx/D                  | 0.41 (0.03-6.40)  | AR2 → LTx/D                  | 0.09 (0.02-0.33)  |
| IR3 → LTx/D                                    | 2.28 (1.29-4.02)  | IR3 → LTx/D                  | 5.07 (1.66-15.47) | IR3 → LTx/D                  | 0.90 (0.45-1.83)  |
| AR3 → LTx/D                                    | 0.27 (0.01-6.28)  | AR3 → LTx/D                  | 0.01 (0.01-7.77)  | AR3 → LTx/D                  | 1.18 (0.23-6.10)  |
| IR4+ → LTx/D                                   | 2.07 (1.12-3.83)  | IR4+ → LTx/D                 | 3.22 (1.72-6.04)  | IR4+ → LTx/D                 | 1.01 (0.48-2.09)  |

Hazard ratios are per one unit increase in  $\log_e(\text{Total Bilirubin})$  at UDCA initiation. Hazard ratios are derived based on the fitted multistate model, by exponentiating the estimated covariate effects on the log-transition intensities.

Abbreviations: Initial inadequate response, IR1; 1<sup>st</sup> adequate response, AR1; 2<sup>nd</sup> inadequate response, IR2; 2<sup>nd</sup> adequate response, AR2; 3<sup>rd</sup> inadequate response, IR3; 3<sup>rd</sup> adequate response, AR3; 4<sup>th</sup> inadequate response and all states thereafter, IR4. Liver transplant or dead, LTx/D; Hazard Ratio, HR.
